# Supplementary material for: A highly efficient in situ redox stabilization strategy for Am–Cm separation using AgBiO3
Source: Royal Society of Chemistry journal article supplement (doi:10.1039/d4dt01650e), 2024-01-01
Supplement: d4dt01650e1.pdf [file d4dt01650e1.pdf]

# A highly efficient *in situ* redox stabilization strategy for Am-Cm separation using AgBiO<sub>3</sub>

Parveen K. Verma<sup>a</sup>, Arunasis Bhattacharyya<sup>\*,a</sup>, Soumen Samanta<sup>b</sup>, Prasanta K. Mohapatra<sup>\*,a</sup>

<sup>a</sup> Radiochemistry Division, <sup>b</sup> Technical Physics Division

---

<sup>a</sup> Radiochemistry Division, Bhabha Atomic Research Centre, Trombay, Mumbai-400085, India. \*Corresponding Authors, E-mail: arun12@barc.gov.in(AB), mpatra@barc.gov.in(PKM)

<sup>b</sup> Technical Physics Division, Bhabha Atomic Research Centre, Trombay, Mumbai-400085, India

---

## Contents

|                                          |    |
|------------------------------------------|----|
| Introduction.....                        | 3  |
| AgBiO <sub>3</sub> characterization..... | 4  |
| X-ray diffraction and XPS analysis ..... | 4  |
| Am-Eu and Am-Cm separation.....          | 4  |
| Figures and Tables.....                  | 5  |
| Eh-pH or Pourbaix diagram.....           | 6  |
| References.....                          | 17 |

## List of Tables

|                                                                                                                                                                               |    |
|-------------------------------------------------------------------------------------------------------------------------------------------------------------------------------|----|
| <b>Table S 1.</b> Half cell reaction used to generate Pourbaix diagram of Am,Ag, S <sub>2</sub> O <sub>8</sub> <sup>2-</sup> , and BiO <sub>3</sub> <sup>-</sup> system. .... | 7  |
| <b>Table S 2.</b> The thermodynamic equation used to plot Am <sup>3+</sup> speciation diagram .....                                                                           | 9  |
| <b>Table S 3.</b> The % contribution of different forms of Ag and Bi in the AgBiO <sub>3</sub> .....                                                                          | 11 |
| <b>Table S 4.</b> Comparison of recent methods with the proposed method in present studies.....                                                                               | 16 |

## List of Figures

|                                                                                                                                                                                                                                                                                                                                                                                              |   |
|----------------------------------------------------------------------------------------------------------------------------------------------------------------------------------------------------------------------------------------------------------------------------------------------------------------------------------------------------------------------------------------------|---|
| <b>Figure S1.</b> The sorption of Eu <sup>3+</sup> (blue bar) and Am <sup>3+</sup> (red bar) onto NaBiO <sub>3</sub> at different pH, Time: 5 minutes, [Am <sup>3+</sup> ] = [Eu <sup>3+</sup> ]: 1×10 <sup>-6</sup> M, [NaBiO <sub>3</sub> ]: 2.5 mg/mL, Temperature: 25 °C, (The initial and final counts of radiotracer in sorption studies were determined using NaI(Tl) detector.)..... | 5 |
|----------------------------------------------------------------------------------------------------------------------------------------------------------------------------------------------------------------------------------------------------------------------------------------------------------------------------------------------------------------------------------------------|---|

**Figure S2.** The sorption of  $\text{Eu}^{3+}$ (red bar) and  $\text{Am}^{3+}$ (green bar) onto  $\text{NaBiO}_3$  at pH~4 at different time interval for (a)  $\text{NaBiO}_3$  and (b)  $\text{H}^+$ - $\text{NaBiO}_3$ ,  $[\text{Am}^{3+}] = [\text{Eu}^{3+}]$ :  $1 \times 10^{-6}$  M,  $[\text{NaBiO}_3]$ : 2.5 mg/mL, pH : 4, Temperature: 25 °C, (The initial and final counts of pure radiotracer in sorption studies were determined using NaI(Tl) detector.). .....6

**Figure S 3.**The Pourbaix diagram of Am-Bi-Ag- $\text{S}_2\text{O}_8$  system .....8

**Figure S4.** Speciation diagram of  $\text{Am}^{3+}$  in aqueous media.....8

**Figure S 5.** Synthesis of  $\text{AgBiO}_3$  by ion-exchange reaction between  $\text{NaBiO}_3$  and  $\text{AgNO}_3$  in aqueous medium, Temperature: 298K, Stirring: 60 minutes.....9

**Figure S 6.** The photograph of (a) pristine  $\text{NaBiO}_3$ , (b)  $\text{H}^+$  activated  $\text{NaBiO}_3$ , and  $\text{AgBiO}_3$  at (c) 1:1 and (d) 3:1 mole ratio of  $\text{AgNO}_3$  and  $\text{NaBiO}_3$ .....10

**Figure S 7.** The SEM images of (a)  $\text{NaBiO}_3$ , (b)  $\text{AgBiO}_3$ , (c) XRD of  $\text{Na}^+$ ,  $\text{H}^+$ , and  $\text{Ag}^+$  form of  $\text{BiO}_3^-$  at 1:1 and 3:1  $\text{AgNO}_3$ : $\text{NaBiO}_3$  mole ratio. ....10

**Figure S8.** The initial  $\text{Am}^{3+}$  spectrum (black) and rise in the  $\text{Am}^{3+}$  peak at 503 nm with time (4 to 20 hr) after quantitative conversion of  $\text{Am}^{3+}$  to  $\text{AmO}_2^+$  on equilibration with  $\text{AgBiO}_3$ ,  $[\text{Am}^{3+}]$ :  $1.2 \times 10^{-4}$  M,  $[\text{AgBiO}_3]$ : 2.5 mg/mL, pH: 4, Temperature: 25 °C. ....12

**Figure S9.** The decrease in the solution concentration of  $\text{BiO}_3^-$  (estimated using absorbance at 543 nm, ( $\epsilon$ : 11.0 reported by Einkauf et al<sup>26</sup>) with time in the supernatant of  $\text{AgBiO}_3$ - $\text{Am}^{3+}$ , suspension centrifuged at 10,000 RPM for 10 minutes;  $[\text{Am}^{3+}]$ :  $1.2 \times 10^{-4}$  M,  $[\text{AgBiO}_3]$ : 2.5 mg/mL, pH: 4, Temperature: 25 °C. The error is shown at the confidence level of 95%.....13

**Figure S10.** The HpGe spectrum of Am-Eu mixture after contact with different amount of  $\text{AgBiO}_3$  (0.7, 1.4, 21 and 2.8 g/L) at different time intervals (a) 5 minutes, (b) 30 minutes and (c) 60 minutes, pH: 4, T : 25 °C. (The  $\gamma$ -spectroscopy was performed using HPGe detector.).....14

**Figure S11.** The shift in the  $\text{AmO}_2^+$  peak after addition of Na-acetate ion, pH: 4,  $[\text{Am}^{3+}]$ :  $1.2 \times 10^{-4}$  M,  $[\text{Na-Acetate}] = 0.1$  M; Temperature: 25 °C. ....15

## Introduction

There are reports on Am-Cm/Eu separations by oxidizing  $\text{Am}^{3+}$  to  $\text{AmO}_2^+$  using  $\text{Na}_2\text{S}_2\text{O}_8$  along with hypochlorite<sup>1</sup> and  $\text{Ag}^+$  salts.<sup>2</sup> Burns et al, reported SFs of  $30 (\pm 10)$ <sup>1</sup> and  $60 (\pm 20)$ <sup>3</sup> and  $20^4$  for  $\text{AmO}_2^+/\text{Nd}^{3+}$ ,  $\text{AmO}_2^+/\text{Eu}^{3+}$  and  $\text{AmO}_2^+/\text{Cm}^{3+}$  using Na-Sn-hybrid, respectively, followed by  $\text{Am}^{3+}$  oxidation to  $\text{AmO}_2^+$  at pH~2 ( $\text{HNO}_3$ ). The average SF (Cm/Am) of  $110 \pm 20$  was reported by Kazi et al.,<sup>2</sup> for Am-Cm separation using the DGA resin followed by  $\text{Am}^{3+}$  oxidation to  $\text{AmO}_2^+$  at pH 2 ( $\text{HNO}_3$ ). Very high SF ( $>10^4$ ) for Am-Eu and Am-Cm separation was reported by oxidizing  $\text{Am}^{3+}$  to  $\text{AmO}_2^+$  in the organic medium using  $\text{HBiO}_3$  extracted with the DGA ligand by adduct formation.<sup>5-7</sup> The same group has also reported a SF of  $>10^5$  for americium/lanthanides separation using a biphasic system.<sup>5</sup> The oxidation achieved in these studies involved the organic phase which appeared less complex as compared to the aqueous phase which contained various complexing ions.

$\text{Am}^{3+}$  can be oxidized to  $\text{AmO}_2^{2+}$  using several reagents under different chemical conditions.<sup>8-13</sup> For example, using  $\text{NaBiO}_3$  in nitric acid,<sup>9</sup>  $\text{O}_3$  in carbonate solution,<sup>14</sup>  $\text{Na}_2\text{S}_2\text{O}_8$  at  $80^\circ\text{C}$  in slightly acidic solutions,<sup>15</sup>, etc.<sup>8</sup> Contrary to these, only a few methods are reported for the direct oxidation of  $\text{Am}^{3+}$  to  $\text{AmO}_2^+$  and are predominantly formed in circumneutral and alkaline conditions.<sup>8</sup> Few common oxidizing agents are ozone, peroxydisulfate<sup>1,4</sup>, or hypochlorite<sup>16</sup> for the direct oxidation of  $\text{Am}^{3+}$  to  $\text{AmO}_2^+$ .<sup>8</sup> The auto reduction of  $\text{AmO}_2^{2+}$  also leads to the *in-situ* formation of  $\text{AmO}_2^+$ .<sup>17, 18</sup>

The  $\text{Am}^{3+} \rightarrow \text{AmO}_2^+$  oxidation by  $\text{NaBiO}_3$  under heating conditions was suggested by Mincher et al.<sup>9</sup> However, Burns et al,<sup>1</sup> have not succeeded in the preparation of  $\text{AmO}_2^+$  by this method<sup>9</sup> and used  $\text{Na}_2\text{S}_2\text{O}_8$ , instead for oxidation.<sup>1</sup> The same group also reported the formation of  $\text{AmO}_2^+$  and  $\text{AmO}_2^{2+}$  from the  $\text{Am}^{3+}$  oxidation by sulfate radical oxidation in  $\text{HNO}_3$  and  $\text{HClO}_4$  medium, respectively.<sup>4</sup> The addition of excess hypochlorite ions is a prerequisite to stabilize and maintain the  $\text{AmO}_2^+$  state in both  $\text{HNO}_3$  and  $\text{HClO}_4$  medium and Am-Cm separation was shown.<sup>4</sup> Later, Mincher et al.,<sup>19</sup> optimized the procedure given by Burns et al.,<sup>4</sup> and achieved quantitative oxidation of  $\text{Am}^{3+}$  to  $\text{AmO}_2^+$  in 0.1 M  $\text{HNO}_3$  with 1.0 M  $\text{Na}_2\text{S}_2\text{O}_8$  at 80-100 °C. Although, the  $\text{Na}_2\text{S}_2\text{O}_8$ -based methods for the generation of  $\text{AmO}_2^+$  are promising but require heating at elevated temperatures for 10-45 minutes.<sup>4</sup> The added  $\text{Na}_2\text{S}_2\text{O}_8$  also leads to the generation of secondary wastes along with an *in situ* generation of  $\text{SO}_4^{2-}$  ions along with  $\text{S}_2\text{O}_8^{2-}$ ,  $\text{OCl}^-$ , as well as  $\text{ClO}_x^-$

(generated by decomposition of the  $\text{Ca}(\text{OCl})_2$ ) and  $\text{CaSO}_4$  precipitation<sup>4</sup> making the overall process complicated.

The  $\text{AmO}_2^+$  generation by the  $\text{NaBiO}_3$  mediated oxidation of  $\text{Am}^{3+}$  under heating conditions is cleaner<sup>9</sup> but introduces  $\text{Bi}^{3+}$  ions into the solution due to the dissolution of  $\text{NaBiO}_3$  followed by its rapid reduction in acidic solution at the temperature used to achieve the  $\text{Am}^{3+} \rightarrow \text{AmO}_2^+$  conversion. The other methods employ high carbonate concentration<sup>14, 20</sup> and also lead to the formation of the  $\text{AmO}_2^+$ -carbonate complex rather than the pure hydrated  $\text{AmO}_2^+$  ions.

Rice, et al.,<sup>21</sup> have recently used  $\text{NaBiO}_3$  as an oxidant and reported the formation of  $\text{AmO}_2^+$  in HCl at pH 1. However, HCl is not only corrosive but its addition to  $\text{NaBiO}_3$  leads to  $\text{Cl}_2$  evolution<sup>22</sup> along with the formation of  $\text{BiOCl}$  precipitates<sup>22</sup> making the process complicated if applied for Am separation beside the loss of  $\text{NaBiO}_3$ .

## **AgBiO<sub>3</sub> characterization**

### **X-ray diffraction and XPS analysis**

The XRD data of the  $\text{NaBiO}_3$  used in the present study matched well with the JCPDF file number PDF # 30-1161, suggesting the di-hydrate form of the  $\text{NaBiO}_3$  i.e. ( $\text{NaBiO}_3 \cdot 2\text{H}_2\text{O}$ ) used in the present studies.<sup>23</sup> XRD of  $\text{AgBiO}_3$  (dried at room temperature) prepared at different  $\text{AgNO}_3$ : $\text{NaBiO}_3$  mole ratio was recorded using XRD unit from Rikagu, Japan. The XRD shows similar pattern for 1:1 to 1:3 mole ratio of  $\text{NaBiO}_3$ : $\text{AgNO}_3$ , suggesting that even 1:1 mole ratio is enough for ion exchange of  $\text{Na}^+$  with  $\text{Ag}^+$  to form  $\text{AgBiO}_3$ . X-ray photoelectron spectroscopy (XPS) measurement of the  $\text{AgBiO}_3$  was carried out using DESA-150 electron analyzer (Staib Instruments, Germany) and Mg-K $\alpha$  (1253.6 eV) source. The binding-energy was calibrated using Au-4f<sub>7/2</sub> line with energy 84.0 eV and C-1s line of energy 284.8 eV. The deconvolution of high-resolution peaks was carried out using XPSPEAK4.1 software.

### **Am-Eu and Am-Cm separation**

The known volume of the Am+Eu mixture was taken at pH 4 and its initial activity was counted using HpGe detector. The mixture was equilibrated with different amount of  $\text{AgBiO}_3$  for 5, 30 and

60 minutes. The resultant suspension was centrifuged at 7000g for 10 minutes and the small aliquot (~100  $\mu$ l) from supernatant was counted using HpGe detector. The similar procedure was used for Am-Cm separation. The initial sample and supernatant after AgBiO<sub>3</sub> treatment was analyzed using  $\alpha$ -spectrometry.

### Figures and Tables

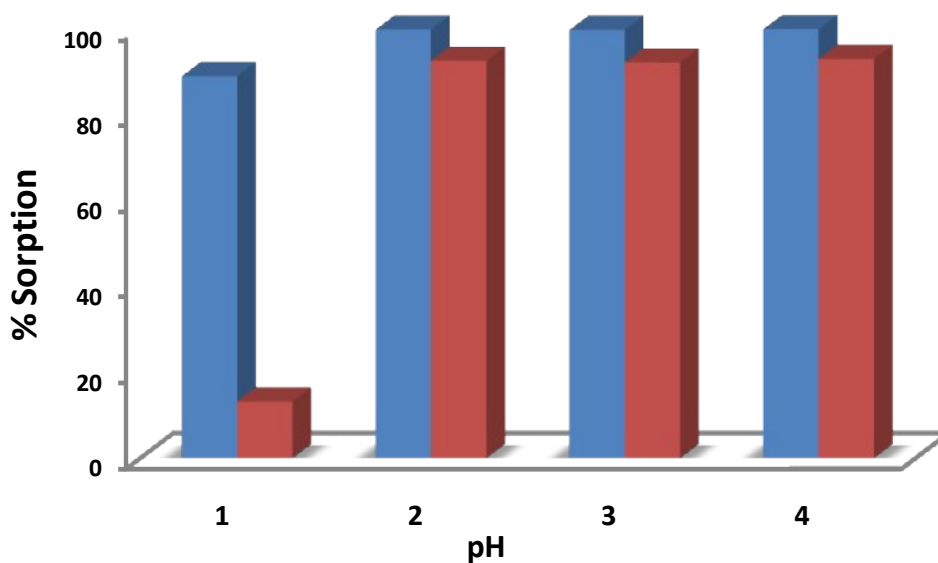

**Figure S1.** The sorption of Eu<sup>3+</sup> (blue bar) and Am<sup>3+</sup> (red bar) onto NaBiO<sub>3</sub> at different pH, Time: 5 minutes, [Am<sup>3+</sup>] = [Eu<sup>3+</sup>]: 1 $\times$ 10<sup>-6</sup> M, [NaBiO<sub>3</sub>]: 2.5 mg/mL, Temperature: 25  $^{\circ}$ C, (The initial and final counts of radiotracer in sorption studies were determined using NaI(Tl) detector.)

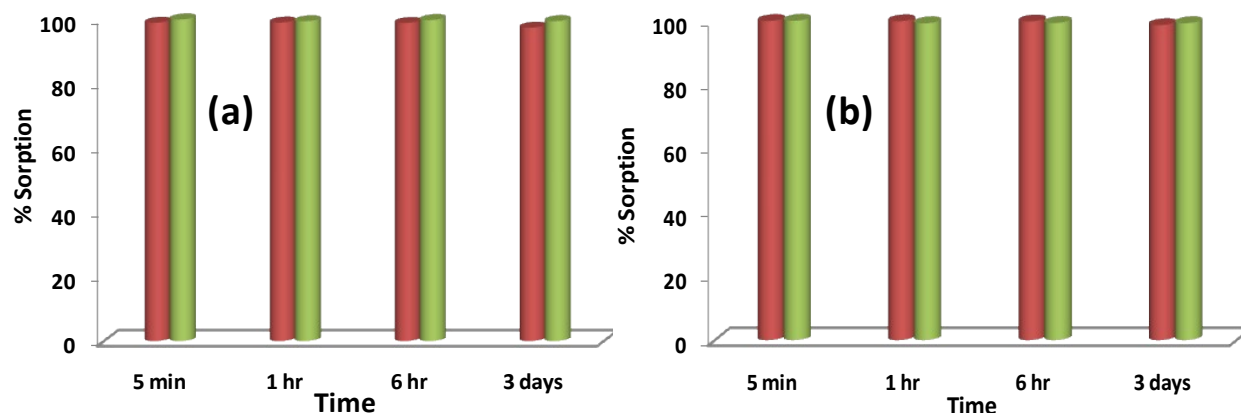

**Figure S2.** The sorption of  $\text{Eu}^{3+}$  (red bar) and  $\text{Am}^{3+}$  (green bar) onto  $\text{NaBiO}_3$  at pH ~4 at different time interval for (a)  $\text{NaBiO}_3$  and (b)  $\text{H}^+$ - $\text{NaBiO}_3$ ,  $[\text{Am}^{3+}] = [\text{Eu}^{3+}]$ :  $1 \times 10^{-6}$  M,  $[\text{NaBiO}_3]$ : 2.5 mg/mL, pH : 4, Temperature: 25 °C, (The initial and final counts of pure radiotracer in sorption studies were determined using NaI(Tl) detector.).

## Eh-pH or Pourbaix diagram

The Pourbaix diagram gives the thermodynamic stability field for different oxidation states of Am in the presence of  $\text{BiO}_3^- \rightarrow \text{Bi}^{3+}$  couple under different pH conditions (the hydrolysis of  $\text{Am}^{3+}$  not included and plotted separately for better representation). The equation used for the Pourbaix diagram is given in Table S1. Although, the higher oxidation states of the Am occurs above the stability line of water oxidation ( $\text{H}_2\text{O} \rightarrow \text{O}_2$ ) but thermodynamic conditions for  $\text{Am}^{3+} \rightarrow \text{AmO}_2^+$  or  $\text{Am}^{3+} \rightarrow \text{AmO}_2^{2+}$  can be inferred from these diagrams. The  $\text{Am}^{3+}$  is the only stable species in the absence of any complexing agents, rest all the higher oxidation states of Am prefer to reduce to  $\text{Am}^{3+}$  by oxidizing water to oxygen. The Eh-pH diagram suggest the  $\text{AmO}_2^+$  formation is difficult below pH 1.5 using  $\text{BiO}_3^- \rightarrow \text{Bi}^{3+}$  couple and prefer to go to the  $\text{AmO}_2^{2+}$  state. The marked stability field for  $\text{AmO}_2^+$  is narrow and even beyond pH 6 (Fig. S3). The equation used for the speciation plot is given in Table S2, the  $\text{BiO}_3^- \rightarrow \text{Bi}^{3+}$  couple crosses the  $\text{Am}^{3+} \rightarrow \text{AmO}_2^+$  lines suggesting its poor oxidation ability beyond that point and hence one has to limit the pH range between pH 1.5 to 6 to achieve  $\text{Am}^{3+} \rightarrow \text{AmO}_2^+$  conversion using  $\text{BiO}_3^- \rightarrow \text{Bi}^{3+}$  couple. However, the higher pH (>5) causes formation of the Am-hydroxo species and lower pH (<3) further narrow the stability field and also increase the tendency of disproportionation of  $\text{AmO}_2^+$  formed by  $\text{Am}^{3+}$  oxidation. This

made us to choose pH ~4 as a safe range for getting stable  $\text{AmO}_2^+$ . The  $\text{Ag}^{2+}$  and  $\text{S}_2\text{O}_8$  have very high potential and can oxidize  $\text{Am}^{3+}$  to  $\text{AmO}_2^{2+}$  under in entire pH range (assuming no other side reaction).

**Table S 1.** Half cell reaction used to generate Pourbaix diagram of Am,Ag,  $\text{S}_2\text{O}_8^{2-}$ , and  $\text{BiO}_3^-$  system.

| <b>Couple</b>                                            | <b>Equations</b>                                                                                 | <b>Standard reduction potential,<br/><math>E^0</math> (V) (I= 0))</b> |
|----------------------------------------------------------|--------------------------------------------------------------------------------------------------|-----------------------------------------------------------------------|
| $\text{AmO}_2^+ \rightarrow \text{Am}^{3+}$              | $\text{AmO}_2^+ + 4\text{H}^+ + 2\text{e}^- \rightarrow \text{Am}^{3+} + 2\text{H}_2\text{O}$    | 1.75 <sup>24</sup>                                                    |
| $\text{AmO}_2^{2+} \rightarrow \text{Am}^{3+}$           | $\text{AmO}_2^{2+} + 4\text{H}^+ + 3\text{e}^- \rightarrow \text{Am}^{3+} + 2\text{H}_2\text{O}$ | 1.70 <sup>24</sup>                                                    |
| $\text{AmO}_2^{2+} \rightarrow \text{AmO}_2^+$           | $\text{AmO}_2^{2+} + \text{e}^- \rightarrow \text{AmO}_2^+$                                      | 1.60 <sup>24</sup>                                                    |
| $\text{BiO}_3^- \rightarrow \text{Bi}^{3+}$              | $\text{BiO}_3^- + 6\text{H}^+ + 2\text{e}^- \rightarrow \text{Bi}^{3+} + 3\text{H}_2\text{O}$    | 2.03 <sup>25</sup>                                                    |
| $\text{Ag}^{2+} \rightarrow \text{Ag}^+$                 | $\text{Ag}^{2+} + \text{e}^- \rightarrow \text{Ag}^+$                                            | 1.98 <sup>3</sup>                                                     |
| $\text{S}_2\text{O}_8^{2-} \rightarrow \text{SO}_4^{2-}$ | $\text{S}_2\text{O}_8^{2-} + 2\text{e}^- \rightarrow 2\text{SO}_4^{2-}$                          | 2.01 <sup>8</sup>                                                     |

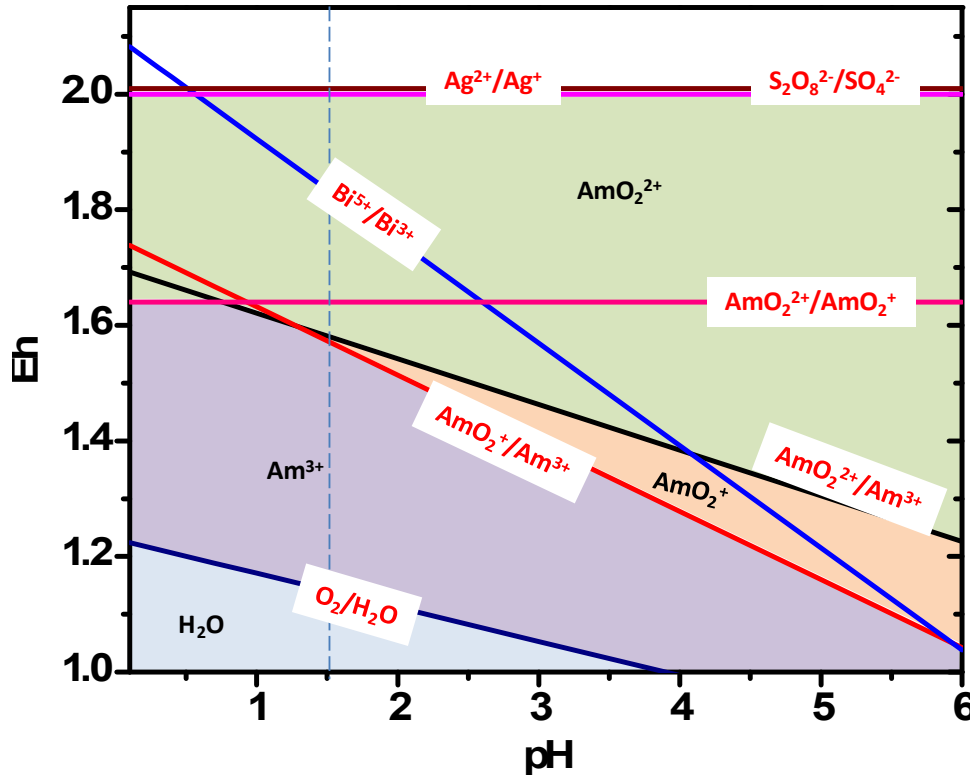

Figure S 3. The Pourbaix diagram of Am-Bi-Ag-S<sub>2</sub>O<sub>8</sub> system

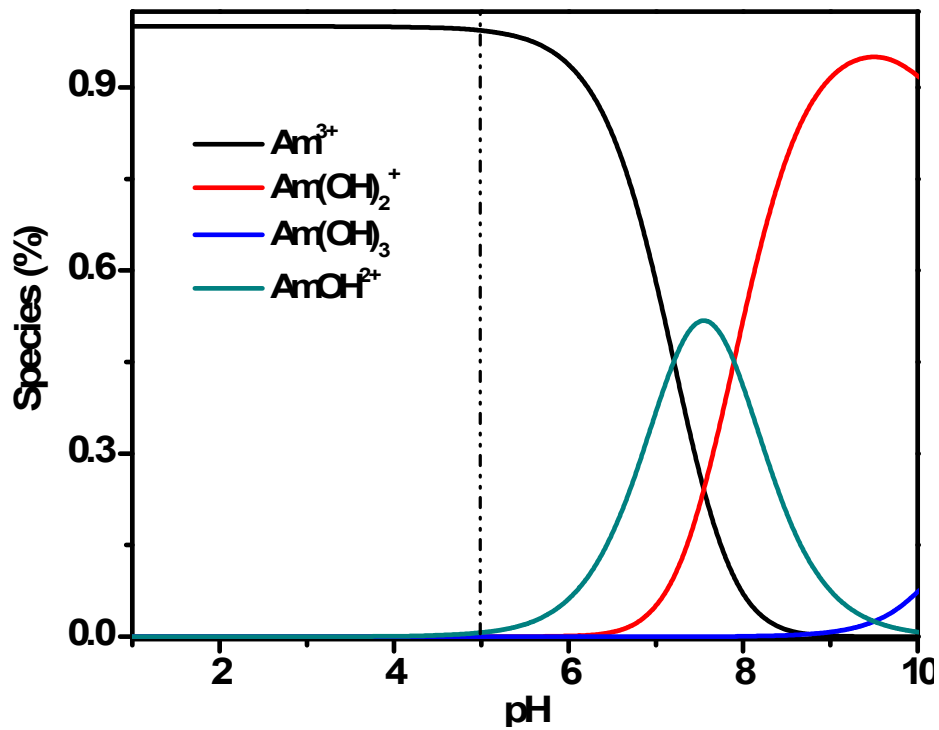

Figure S4. Speciation diagram of Am<sup>3+</sup> in aqueous media



**Table S 2.** The thermodynamic equation used to plot  $\text{Am}^{3+}$  speciation diagram

| Thermodynamic equations                                                                   | $\log\beta$ |
|-------------------------------------------------------------------------------------------|-------------|
| $\text{Am}^{3+} + \text{H}_2\text{O} \rightarrow \text{AmOH}^{2+} + \text{H}^+$           | -7.2        |
| $\text{Am}^{3+} + \text{H}_2\text{O} \rightarrow \text{Am}(\text{OH})_2^+ + 2 \text{H}^+$ | -15.1       |
| $\text{Am}^{3+} + \text{H}_2\text{O} \rightarrow \text{Am}(\text{OH})_3 + 3 \text{H}^+$   | -26.2       |
| $\text{H}_2\text{O} \rightarrow \text{H}^+ + \text{OH}^-$                                 | -14.0       |

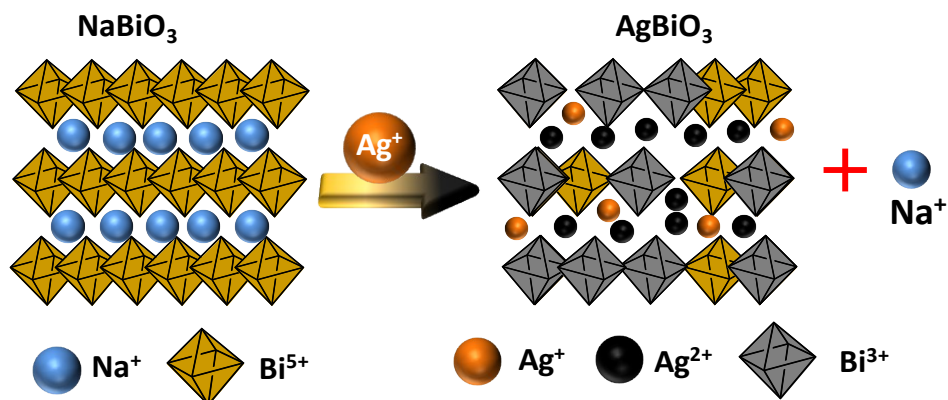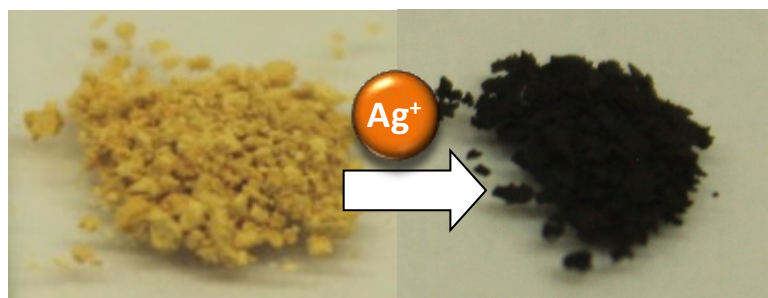

**Figure S 5.** Synthesis of  $\text{AgBiO}_3$  by ion-exchange reaction between  $\text{NaBiO}_3$  and  $\text{AgNO}_3$  in aqueous medium, Temperature: 298K, Stirring: 60 minutes

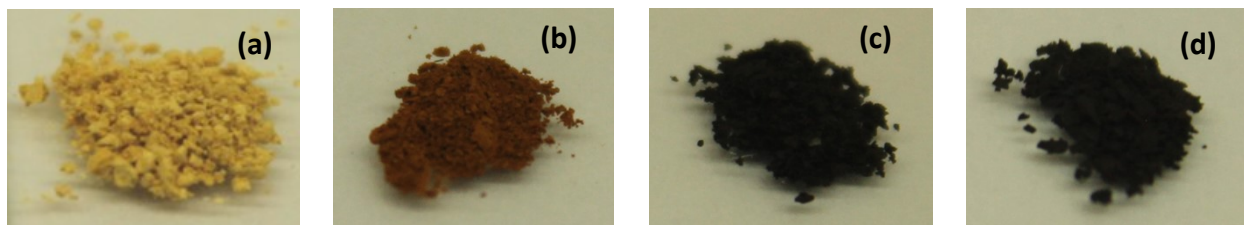

**Figure S 6.** The photograph of (a) pristine  $\text{NaBiO}_3$ , (b)  $\text{H}^+$  activated  $\text{NaBiO}_3$ , and  $\text{AgBiO}_3$  at (c) 1:1 and (d) 3:1 mole ratio of  $\text{AgNO}_3$  and  $\text{NaBiO}_3$ .

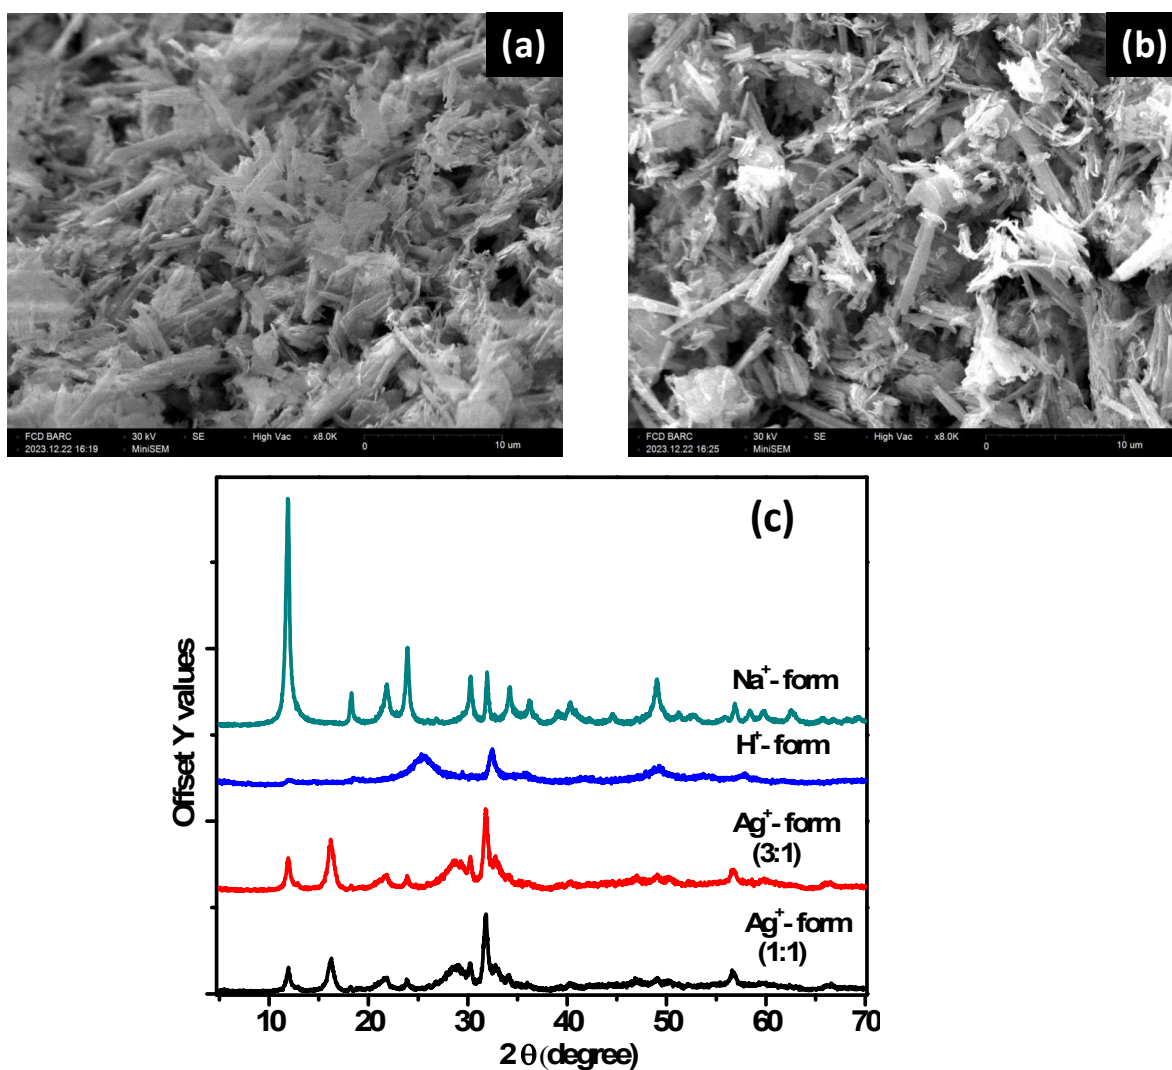

**Figure S 7.** The SEM images of (a)  $\text{NaBiO}_3$ , (b)  $\text{AgBiO}_3$ , (c) XRD of  $\text{Na}^+$ ,  $\text{H}^+$ , and  $\text{Ag}^+$  form of  $\text{BiO}_3^-$  at 1:1 and 3:1  $\text{AgNO}_3$ : $\text{NaBiO}_3$  mole ratio.

**Table S 3.** The % contribution of different forms of Ag and Bi in the AgBiO<sub>3</sub>

| Element | Peak position (eV) | % Contribution (%std Dev) | Nature of species |
|---------|--------------------|---------------------------|-------------------|
| Ag_3d   | 368.0              | 81.7 (0.75%)              | Ag <sup>2+</sup>  |
|         | 374.0              | 89.2(0.39%)               |                   |
|         | 368.9              | 18.3 (0.41%)              | Ag <sup>+</sup>   |
|         | 375.4              | 10.8 (0.43%)              |                   |
| Bi_4f   | 159.0              | 63.7 (0.29%)              | Bi <sup>3+</sup>  |
|         | 164.3              | 63.0 (0.43%)              |                   |
|         | 159.9              | 36.3 (0.26%)              | Bi <sup>5+</sup>  |
|         | 165.2              | 37.0 (0.61%)              |                   |

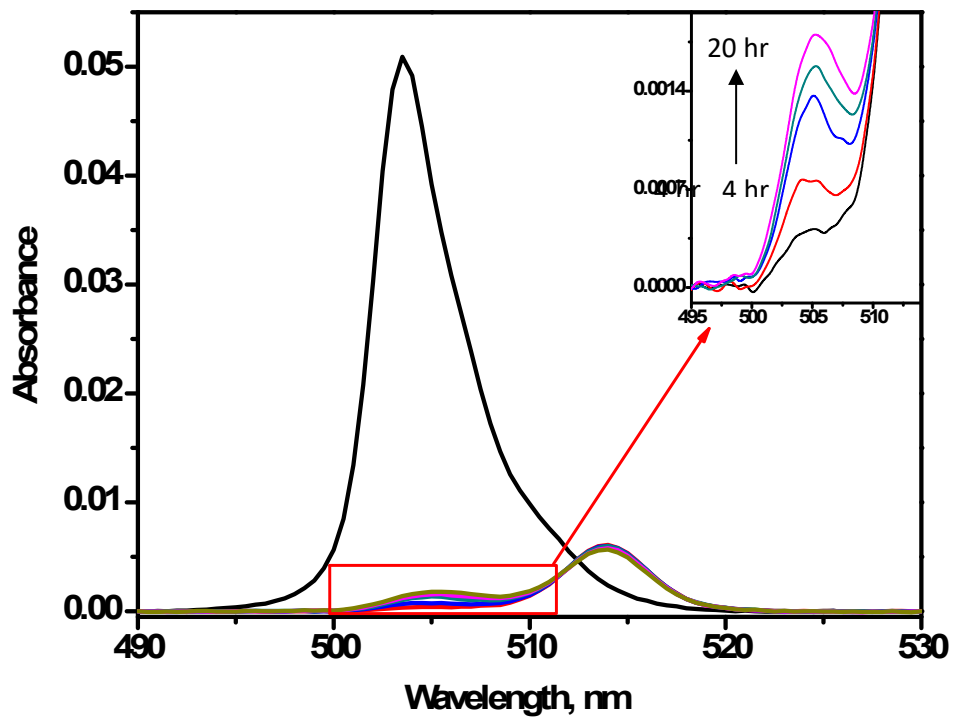

**Figure S8.** The initial  $\text{Am}^{3+}$  spectrum (black) and rise in the  $\text{Am}^{3+}$  peak at 503 nm with time (4 to 20 hr) after quantitative conversion of  $\text{Am}^{3+}$  to  $\text{AmO}_2^+$  on equilibration with  $\text{AgBiO}_3$ ,  $[\text{Am}^{3+}]$ :  $1.2 \times 10^{-4}$  M,  $[\text{AgBiO}_3]$ : 2.5 mg/mL, pH: 4, Temperature: 25 °C.

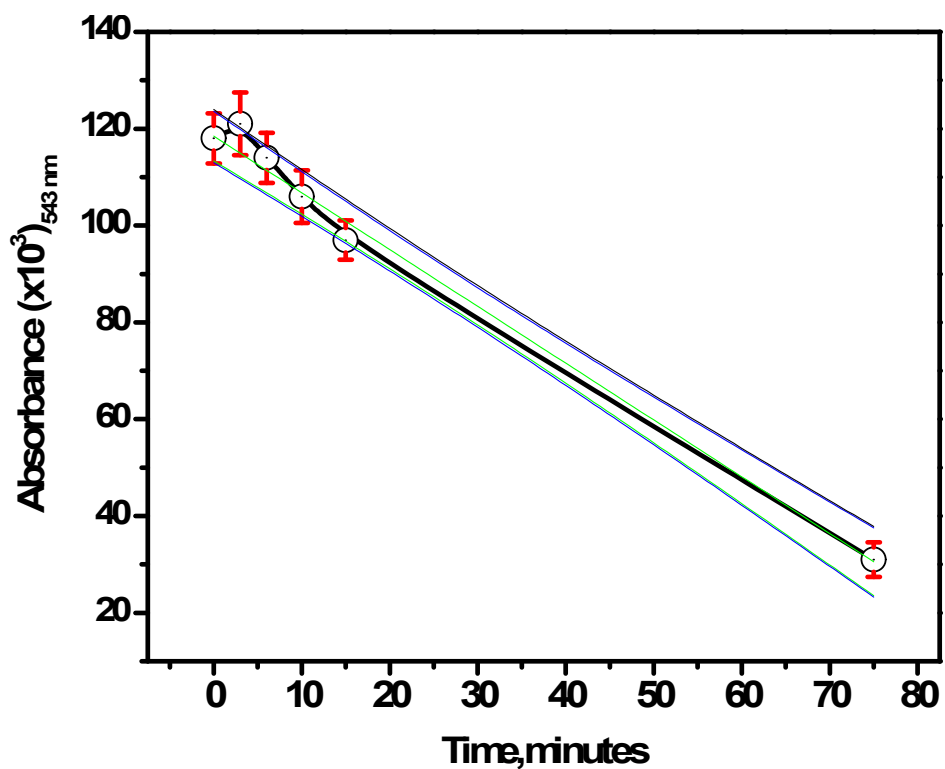

**Figure S9.** The decrease in the solution concentration of  $\text{BiO}_3^-$  (estimated using absorbance at 543 nm, ( $\epsilon$ : 11.0 reported by Einkauf et al<sup>26</sup>) with time in the supernatant of  $\text{AgBiO}_3\text{-Am}^{3+}$ , suspension centrifuged at 10,000 RPM for 10 minutes;  $[\text{Am}^{3+}]$ :  $1.2 \times 10^{-4}$  M,  $[\text{AgBiO}_3]$ : 2.5 mg/mL, pH: 4, Temperature: 25 °C. The error is shown at the confidence level of 95%.

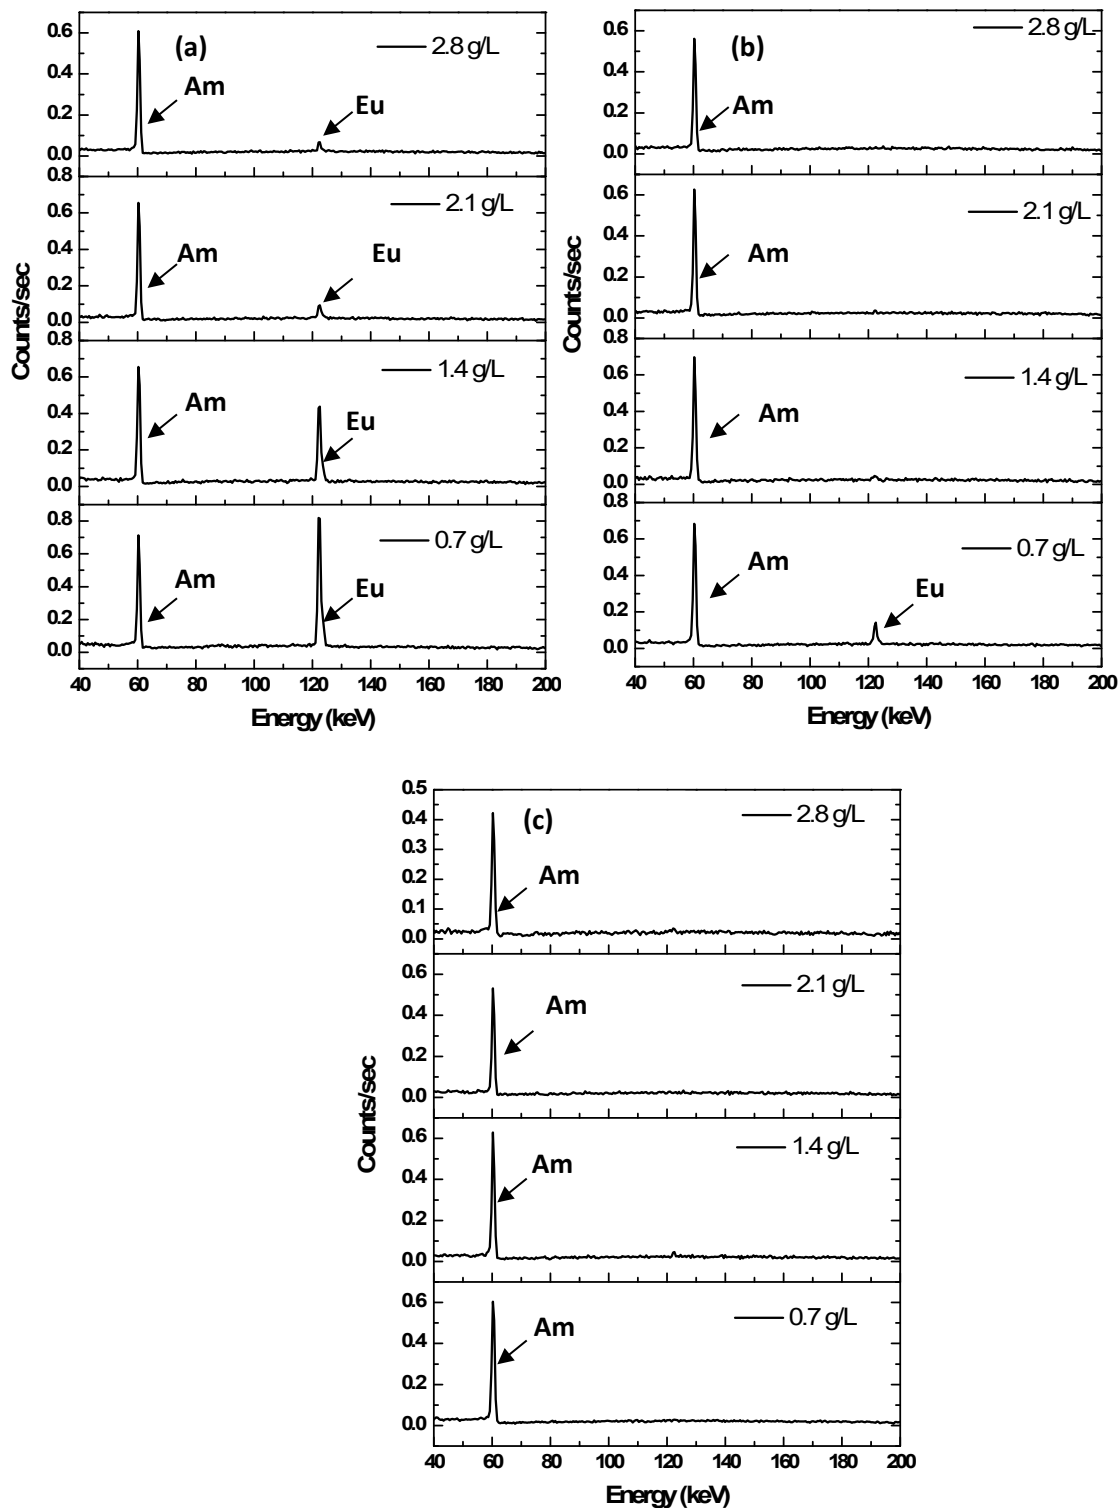

**Figure S10.** The HpGe spectrum of Am-Eu mixture after contact with different amount of  $\text{AgBiO}_3$  (0.7, 1.4, 2.1 and 2.8 g/L) at different time intervals (a) 5 minutes, (b) 30 minutes and (c) 60 minutes, pH: 4, T : 25 °C. (The  $\gamma$ -spectroscopy was performed using HPGe detector.)

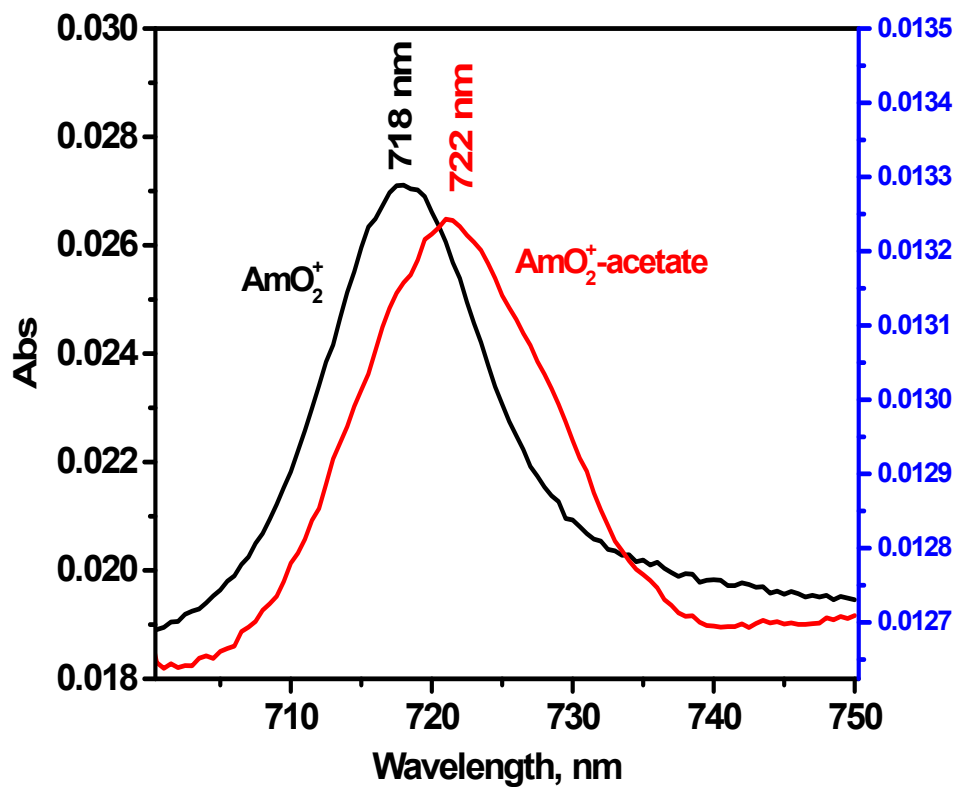

**Figure S11.** The shift in the AmO<sub>2</sub><sup>+</sup> peak after addition of Na-acetate ion, pH: 4, [Am<sup>3+</sup>]: 1.2×10<sup>-4</sup> M, [Na-Acetate] = 0.1 M; Temperature: 25 °C.

**Table S 4.** Comparison of recent methods with the proposed method in present studies

| <b>Reagents</b>                                                                                                     | <b>Shortcomings</b>                                                                                                                                                                   | <b>Ref.*</b> |
|---------------------------------------------------------------------------------------------------------------------|---------------------------------------------------------------------------------------------------------------------------------------------------------------------------------------|--------------|
| NaBiO <sub>3</sub> : 15-20 g/L<br>pH: 1, Temp: 80 °C<br>Time:>30 minutes                                            | Higher NaBiO <sub>3</sub> dissolution:<br>Bi <sup>3+</sup> in solution<br>High temperature                                                                                            | 9            |
| Na <sub>2</sub> S <sub>2</sub> O <sub>8</sub> + Ca(OCl) <sub>2</sub><br>pH: 1-2, Temp: 80-100 °C<br>Time: 10–45 min | Interfering ions: S <sub>2</sub> O <sub>8</sub> <sup>-</sup> , SO <sub>4</sub> <sup>2-</sup> ,<br>ClO <sub>x</sub> , OCl <sup>-</sup><br>In situ gypsum formation<br>High temperature | 19           |
| NaBiO <sub>3</sub> : 15-20 g/L<br>pH: 1 (HCl) ,Temp: 25 °C<br>Time: 24 hours                                        | Corrosive acid<br>Cl <sub>2</sub> effervescences<br>Insitu BiOCl generation                                                                                                           | 21           |
| AgBiO <sub>3</sub> : 2-3 g/L<br>pH: 4, Temp: 25 °C<br>Time: 5-10 minutes                                            | Room temperature,<br>No interfering ions<br>pH ~4: poor disproportionation                                                                                                            | p.w.         |



## References

1. J. D. Burns, M. Borkowski, A. Clearfield and D. T. Reed, 2012, **100**, 901-906.
2. Z. Kazi, N. Guérin, M. Christl, M. Totland, A. Gagné and S. Burrell, *J. Radioanal. Nucl. Chem.*, 2019, **321**, 227-233.
3. P. Zsabka, A. Wilden, K. Van Hecke, G. Modolo, M. Verwerft and T. Cardinaels, *J. Nucl. Mater.*, 2023, **581**.
4. J. D. Burns, T. C. Shehee, A. Clearfield and D. T. Hobbs, *Anal. Chem.*, 2012, **84**, 6930-6932.
5. X. Dong, H. Hao, J. Chen, Z. Wang and C. Xu, *Chemical Science*, 2024, **15**, 2118-2122.
6. Z. Wang, J. B. Lu, X. Dong, Q. Yan, X. Feng, H. S. Hu, S. Wang, J. Chen, J. Li and C. Xu, *J. Am. Chem. Soc.*, 2022, **144**, 6383-6389.
7. Z. Wang, X. Dong, Q. Yan, J. Chen and C. Xu, *Anal. Chem.*, 2022, **94**, 7743-7746.
8. W. H. Runde and B. J. Mincher, *Chem. Rev.*, 2011, **111**, 5723-5741.
9. B. J. Mincher, L. R. Martin and N. C. Schmitt, *Inorg. Chem.*, 2008, **47**, 6984-6989.
10. T. S. Grimes, B. J. Mincher and N. C. Schmitt, *Reduction Rates for Higher Americium Oxidation States in Nitric Acid*, Idaho National Lab.(INL), Idaho Falls, ID (United States), 2015.
11. L. B. Asprey, S. E. Stephanou and R. A. Penneman, *J. Am. Chem. Soc.*, 1951, **73**, 5715-5717.
12. K. McCann, D. M. Brigham, S. Morrison and J. C. Braley, *Inorg. Chem.*, 2016, **55**, 11971-11978.
13. B. J. Mincher, L. R. Martin and N. C. Schmitt, 2007.
14. J. S. Coleman, T. K. Keenan, L. H. Jones, W. T. Carnall and R. A. Penneman, *Inorg. Chem.*, 1963, **2**, 58-61.
15. L. B. Asprey, S. E. Stephanou and R. A. Penneman, *J. Am. Chem. Soc.*, 1950, **72**, 1425-1426.
16. L. B. Werner and I. Perlman, *J. Am. Chem. Soc.*, 1951, **73**, 495-496.
17. G. P. Horne, T. S. Grimes, W. F. Bauer, C. J. Dares, S. M. Pimblott, S. P. Mezyk and B. J. Mincher, *Inorg. Chem.*, 2019, **58**, 8551-8559.
18. T. S. Grimes, G. P. Horne, C. J. Dares, S. M. Pimblott, S. P. Mezyk and B. J. Mincher, *Inorg. Chem.*, 2017, **56**, 8295-8301.
19. B. J. Mincher, N. C. Schmitt, B. K. Schuetz, T. C. Shehee and D. T. Hobbs, *RSC Adv.*, 2015, **5**, 27205-27210.
20. J. P. Nigon, R. A. Penneman, E. Staritzky, T. K. Keenan and L. B. Asprey, *The Journal of Physical Chemistry*, 1954, **58**, 403-404.
21. N. T. Rice, E. Dalodière, S. L. Adelman, Z. R. Jones, S. A. Kozimor, V. Mocko, H. D. Root and B. W. Stein, *Inorg. Chem.*, 2022, **61**, 12948-12953.
22. W. Dou, X. Hu, L. Kong, X. Peng and X. Wang, *Desalination*, 2020, **491**.
23. Y. Feng, X. Huang, Q. Zhan and D. Jiang, *Journal of Materials Science: Materials in Electronics*, 2019, **30**, 10543-10549.
24. S. Ahrland, J. O. Liljenzin and J. Rydberg, in *Comprehensive Inorganic Chemistry*, eds. J. C. Bailar, H. J. Emeleus, R. Nyholm and A. F. Trotman-Dickenson, Pergamon, Oxford, 1973, DOI: <https://doi.org/10.1016/B978-1-4832-8313-5.50033-4>, pp. 465-635.
25. M. H. Ford-Smith and J. J. Habeeb, *J. Chem. Soc., Dalton Trans.*, 1973, DOI: 10.1039/DT9730000461, 461-464.
26. J. D. Einkauf and J. D. Burns, *ACS Applied Energy Materials*, 2020, **3**, 1593-1601.
